# Supplementary material
Source: PubMed Central journal article supplement (PMC6760872)

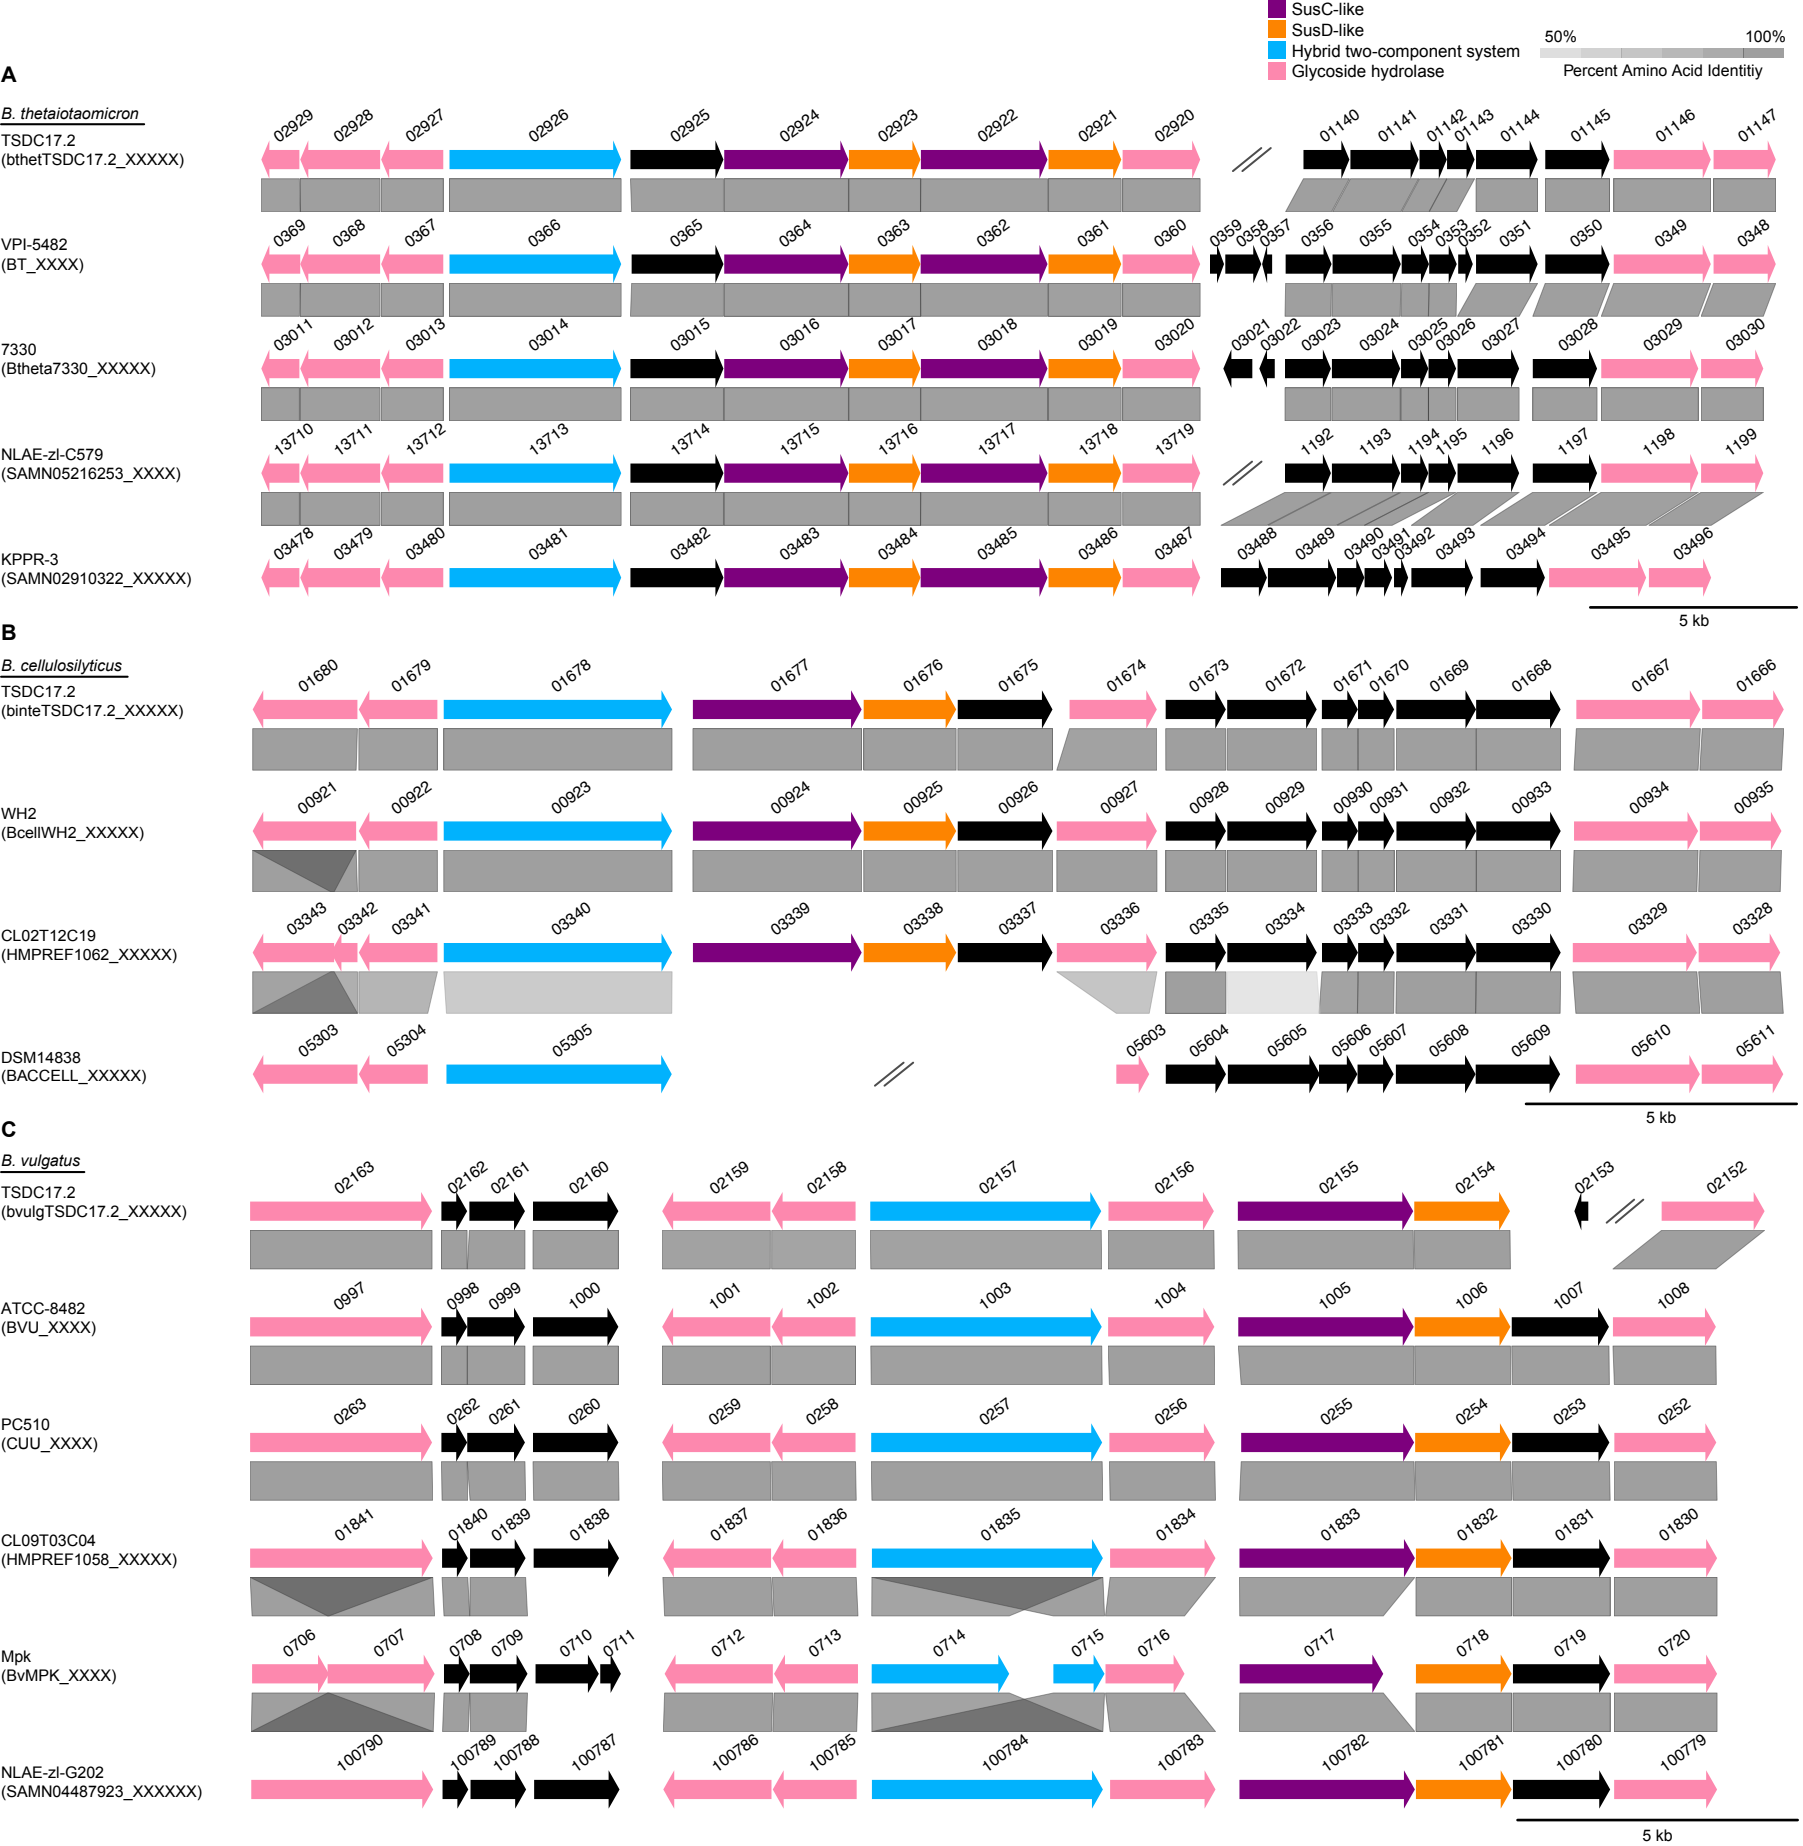

Supplement: NIHMS1537106-supplement-1.pdf [file NIHMS1537106-supplement-1.pdf]

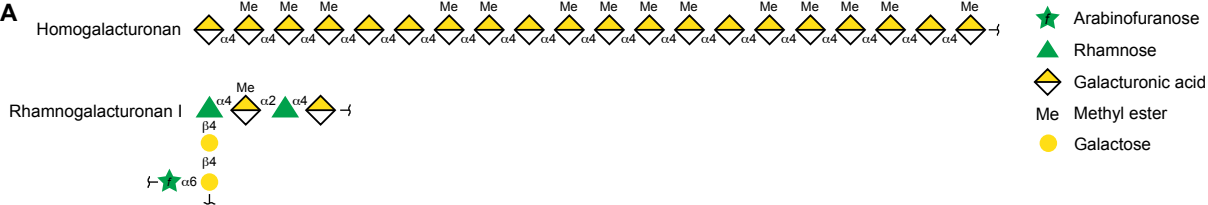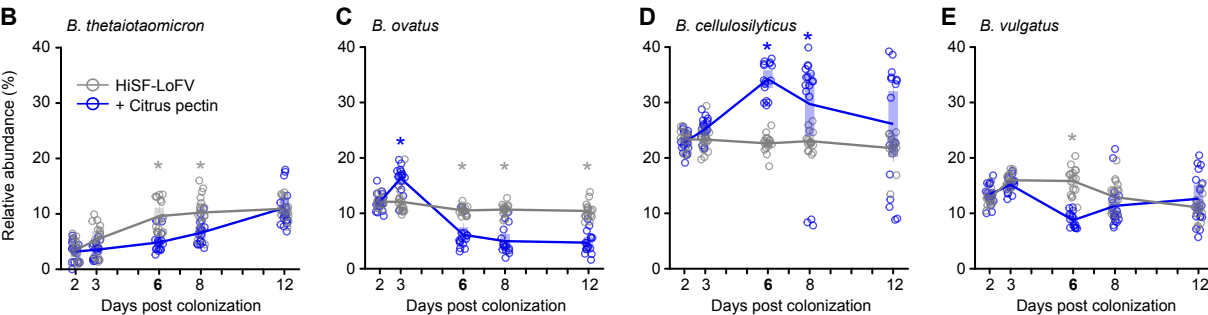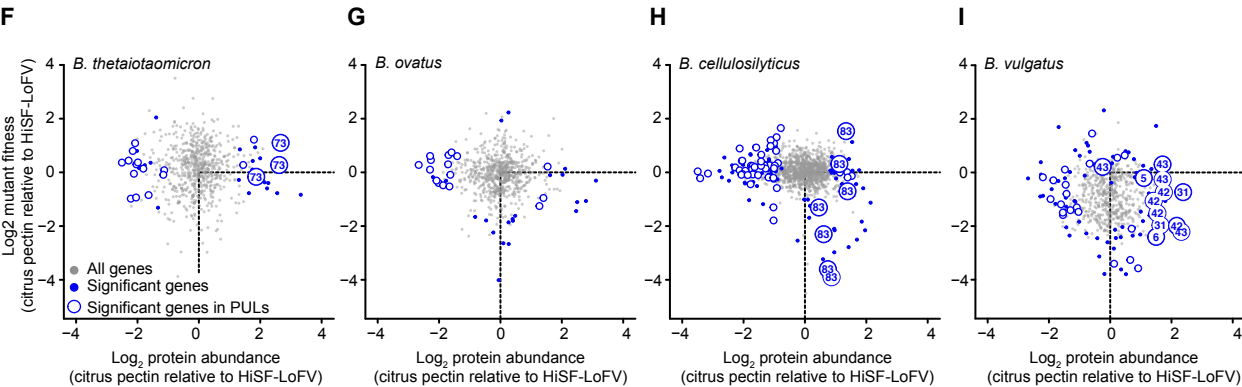

Supplement: NIHMS1537106-supplement-2.pdf [file NIHMS1537106-supplement-2.pdf]

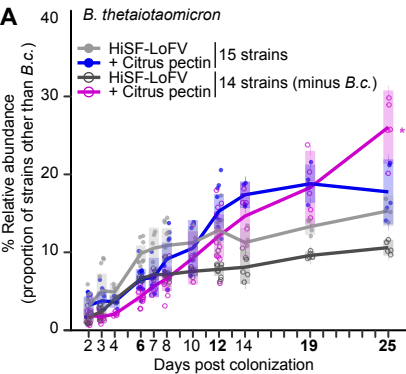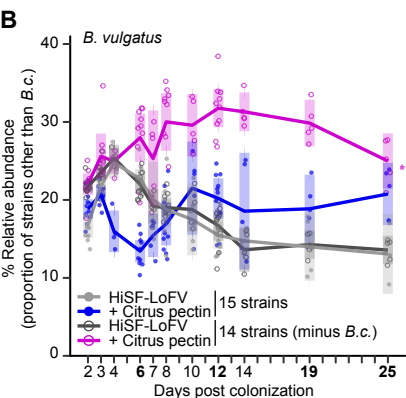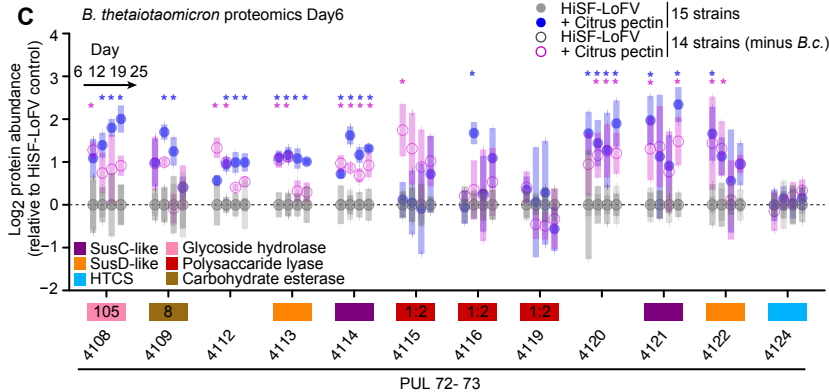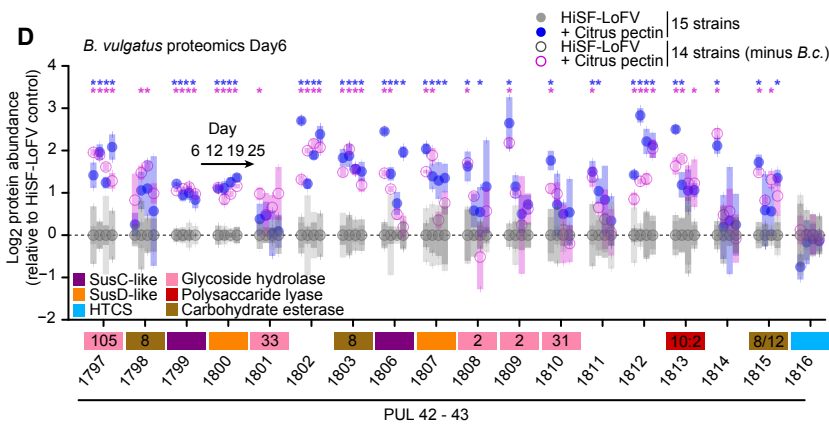

Supplement: NIHMS1537106-supplement-3.pdf [file NIHMS1537106-supplement-3.pdf]

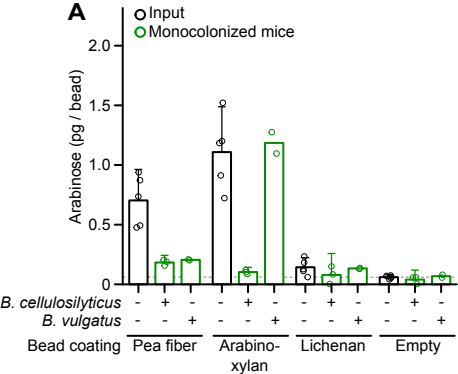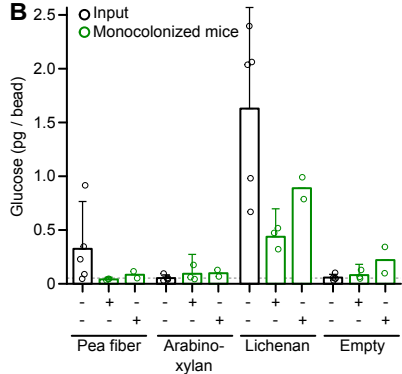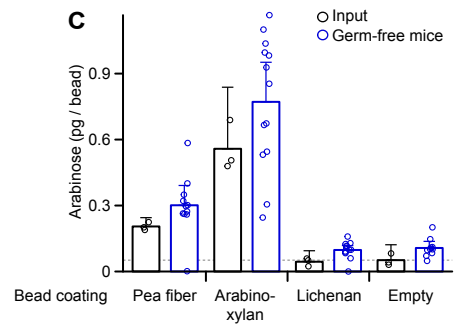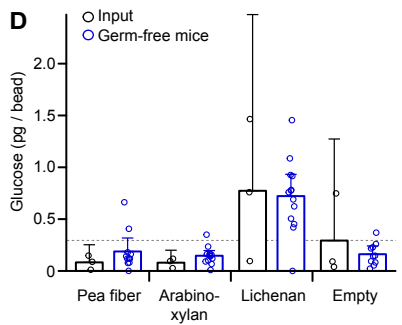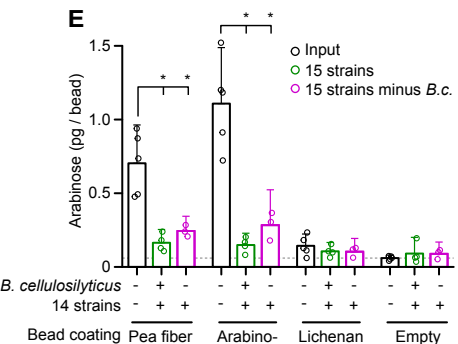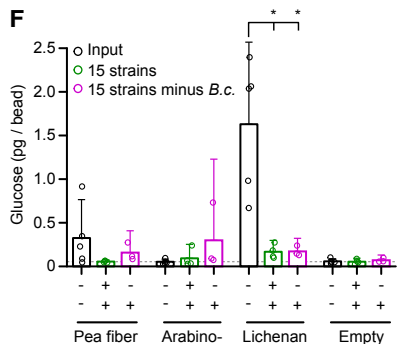

Supplement: NIHMS1537106-supplement-4.pdf [file NIHMS1537106-supplement-4.pdf]

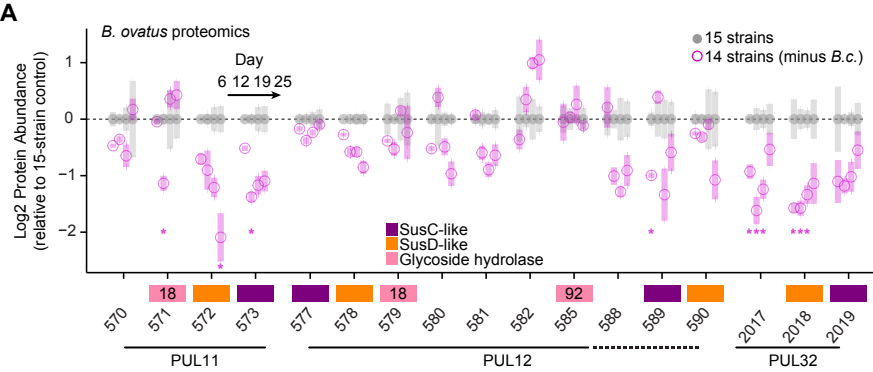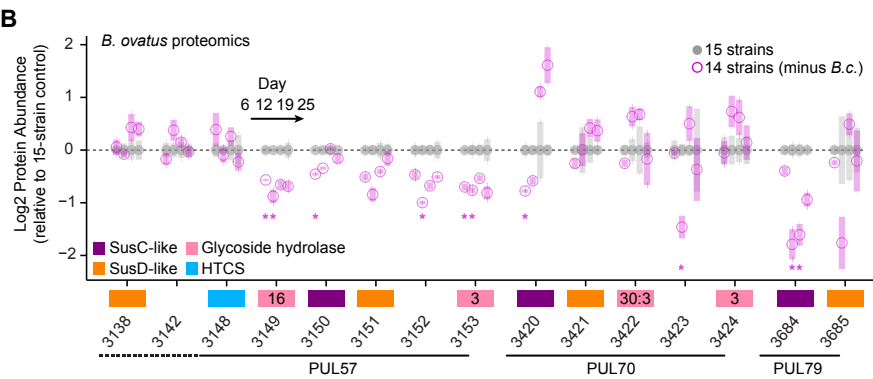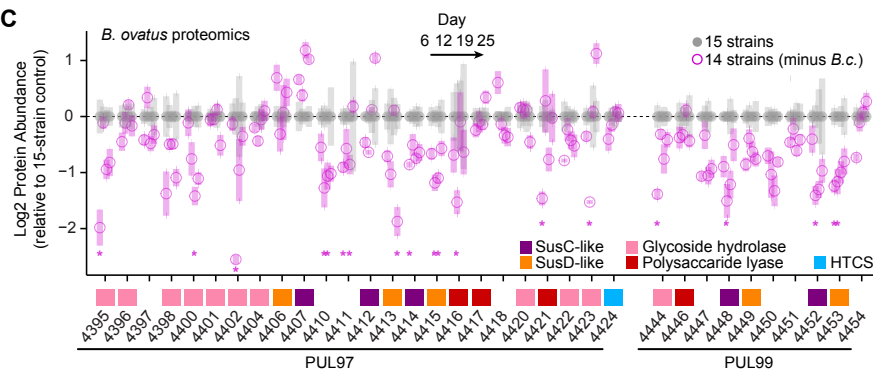

Supplement: NIHMS1537106-supplement-5.pdf [file NIHMS1537106-supplement-5.pdf]
